# Supplementary material for: S-Phase Synchronization Facilitates the Early Progression of Induced-Cardiomyocyte Reprogramming through Enhanced Cell-Cycle Exit
Source: Preprints.org preprint supplement (doi:10.20944/preprints201803.0185.v1), 2018-03-21
Supplement: Supplementary file 1 [file supplementary]

# SUPPLEMENTARY FIGURES

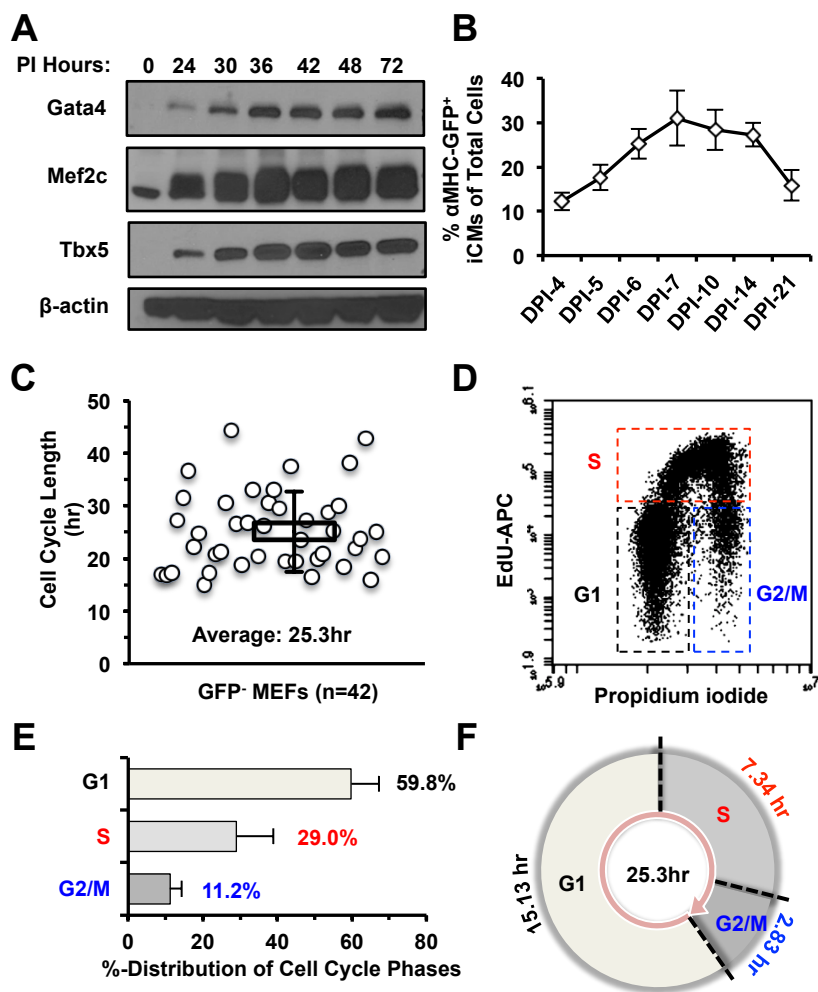

**Figure S1. iCM Reprogramming by monocistronic Gata4, Mef2c, and Tbx5 (GMT) and cell cycle length of MEFs.** **A)** Representative western blot image shows the expression of Gata4, Mef2c, and Tbx5 in MEFs at different post-infection hours. **B)** The percentage of αMHC-GFP<sup>+</sup> GMT-iCMs from DPI-4 to DPI-21 (n=3). **C)** Non-reprogrammed MEFs, which had two consecutive cell divisions in the time-lapse recordings (n=42), had an average of 25.3±7.4 hours cell-cycle length. **D)** Representative FACS plot of EdU assay with two-hour EdU-labeling showing a distribution of cell-cycle phases in MEFs. **E)** The average percentages of G1-, S-, and G2/M-phase in MEFs (n=4). **F)** MEFs had an average of 15.2-hour G1 phase, 7.3-hour S phase, and 2.8-hour G2/M phase.

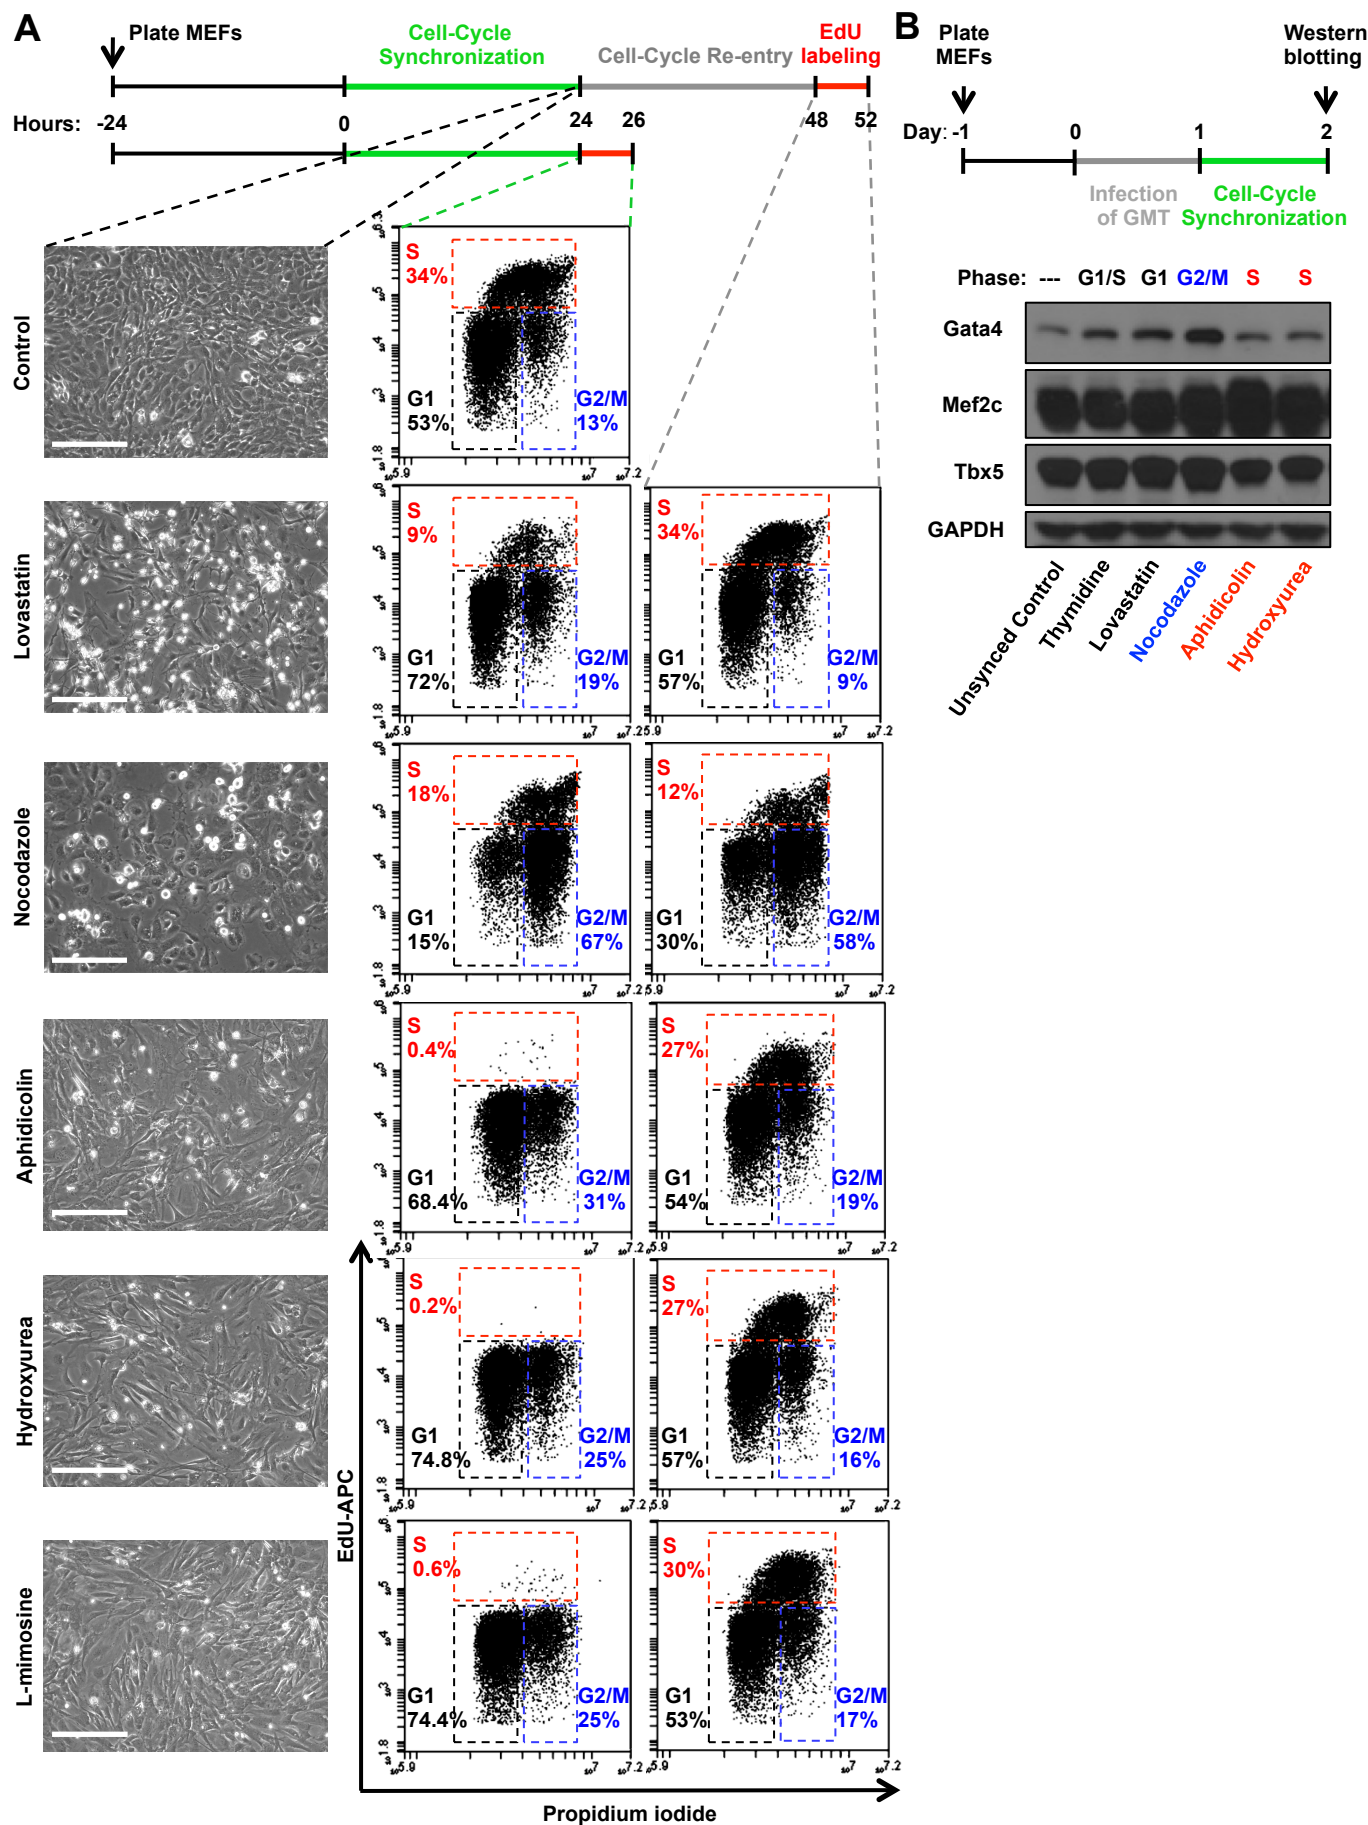

**Figure S2. Cell-cycle synchronization and reentrance of MEFs.** A) Representative pictures and FACS plots show that un-reprogrammed MEFs were synchronized into different cell-cycle phases by relevant treatments. Synchronized MEFs reentered cell cycle 24 hours after releasing from synchronization (Right). Scale bars indicate 50 $\mu$ m. B) Protein expressions of Gata4, Mef2c, and Tbx5 in MEFs were not inhibited by any treatments of cell-cycle synchronization.

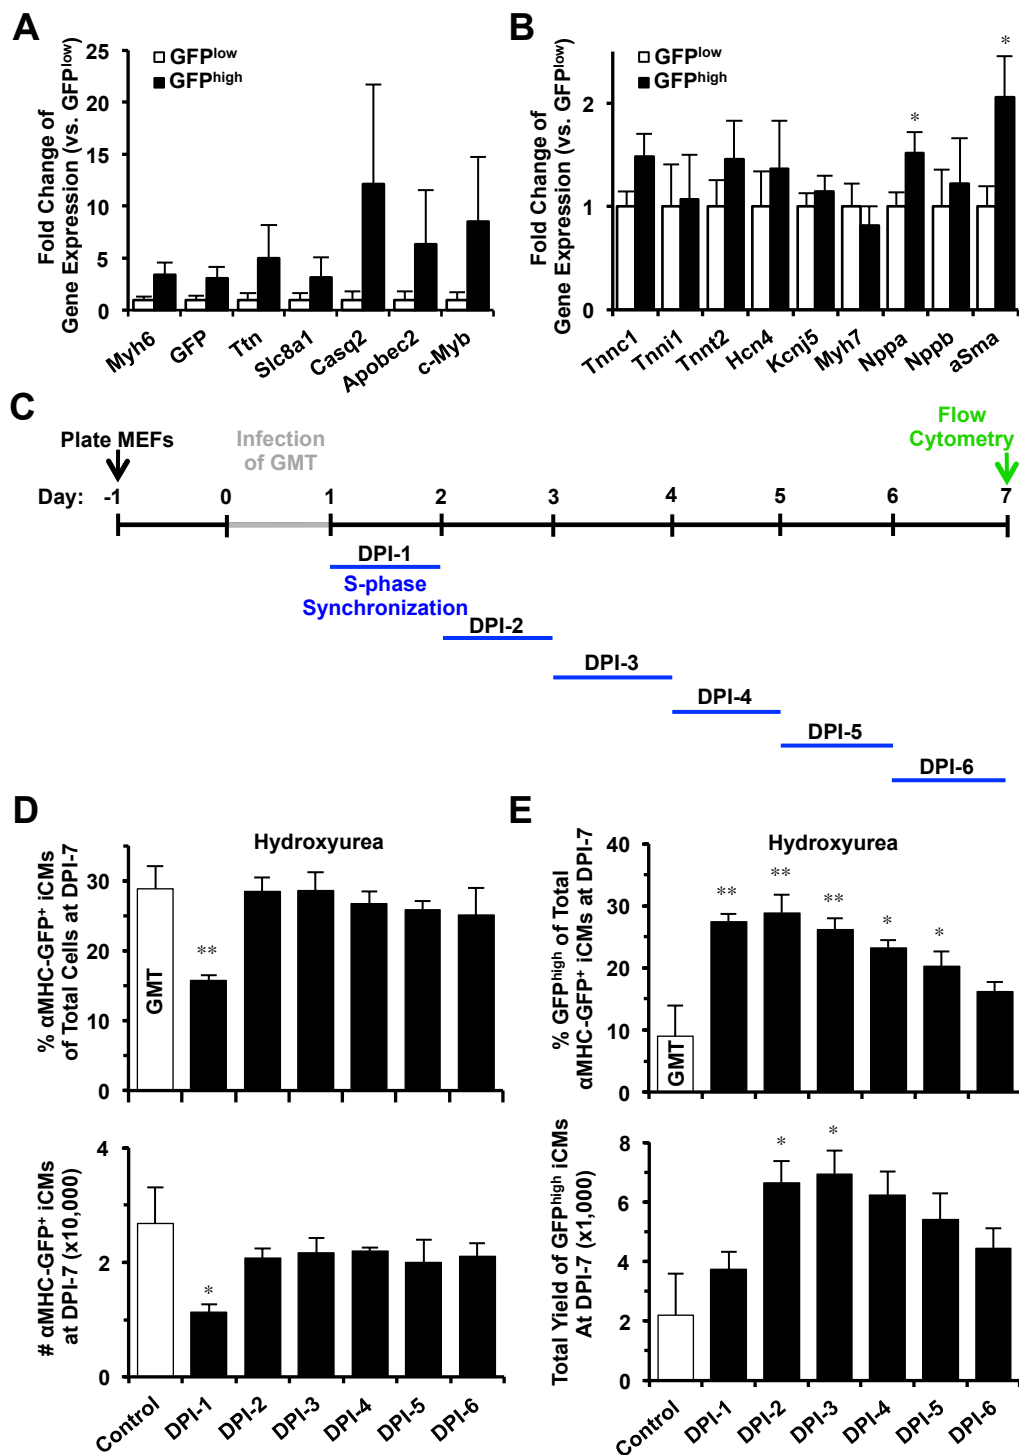

**Figure S3. S-phase synchronization increases the yield of GFP<sup>high</sup> iCMs.** A-B) Comparisons of cardiac gene expressions between GFP<sup>low</sup> and GFP<sup>high</sup> iCMs (n=6). \*p<0.05 vs. GFP<sup>low</sup>. C) Experimental design of S-phase synchronization from DPI-1 to DPI-7. D) The effect of S-phase synchronization by hydroxyurea (n=3) from DPI-1 to DPI-6 on the percentage and absolute number of αMHC-GFP<sup>+</sup> GMT-iCMs. E) The effect of hydroxyurea-synchronization (n=4) from DPI-1 to DPI-6 on the percentage and total yield of GFP<sup>high</sup> iCMs. \*p<0.05; \*\*p<0.01, \*\*\*p<0.001 vs. control.

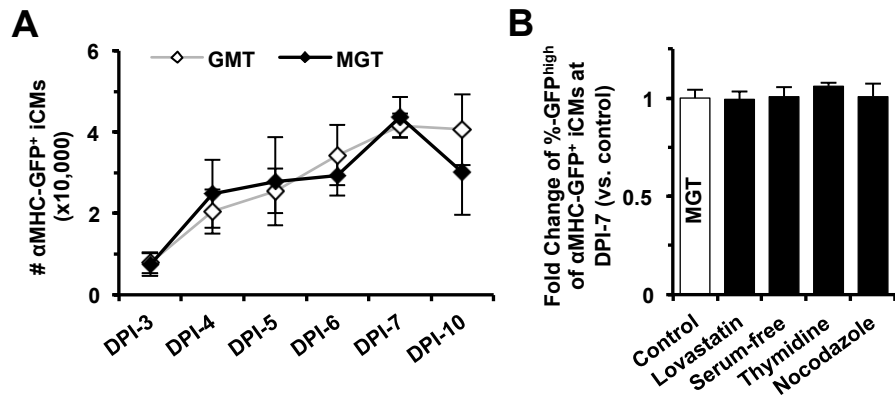

**Figure S4. The influence of cell-cycle synchronization on polycistronic MGT-reprogramming.** **A)** Polycistronic MGT successfully reprogrammed MEFs and yielded a similar number of  $\alpha$ MHC-GFP<sup>+</sup> iCMs as monocistronic GMT (n=3). **B)** Cell-cycle synchronizations of G1 (lovastatin and serum-free), G1/S (thymidine), and G2/M (nocodazole) at DPI-1 had no significant influence on the yield of GFP<sup>high</sup> MGT-iCMs

**Table S1.** Time from cell division back to reprogramming initiation in GMT-iCMs

| Total # of<br>time-lapsed<br>$\alpha$ MHC-GFP+<br>iCMs | Dividing<br>iCMs<br>used for<br>analysis | Time from cell<br>division back to<br>reprogramming<br>initiation (hrs) |
|--------------------------------------------------------|------------------------------------------|-------------------------------------------------------------------------|
| Batch-1 (64 iCMs)                                      | #1                                       | 4.25                                                                    |
|                                                        | #2                                       | 19                                                                      |
|                                                        | #3                                       | 20                                                                      |
|                                                        | #4                                       | 12.5                                                                    |
|                                                        | #5                                       | 11.25                                                                   |
|                                                        | #6                                       | 14.5                                                                    |
|                                                        | #7                                       | 13.75                                                                   |
|                                                        | #8                                       | 13.5                                                                    |
|                                                        | #9                                       | 16.5                                                                    |
|                                                        | #10                                      | 9.25                                                                    |
|                                                        | #11                                      | 2                                                                       |
|                                                        | #12                                      | 15                                                                      |
|                                                        | #13                                      | 18                                                                      |
|                                                        | #14                                      | 5.5                                                                     |
|                                                        | #15                                      | 12.25                                                                   |
|                                                        | #16                                      | 4.5                                                                     |
|                                                        | #17                                      | 5.5                                                                     |
|                                                        | #18                                      | 6.25                                                                    |
| Batch-2 (26 iCMs)                                      | #19                                      | 14.75                                                                   |
|                                                        | #20                                      | 16.5                                                                    |
|                                                        | #21                                      | 14.5                                                                    |
|                                                        | #22                                      | 10                                                                      |
|                                                        | #23                                      | 14.75                                                                   |
|                                                        | #24                                      | 4.5                                                                     |
| Batch-3 (44 iCMs)                                      | #25                                      | 2.25                                                                    |
|                                                        | #26                                      | 18.25                                                                   |
|                                                        | #27                                      | 19.25                                                                   |
|                                                        | #28                                      | 21.5                                                                    |
|                                                        | #29                                      | 7.75                                                                    |
|                                                        | #30                                      | 18.75                                                                   |
|                                                        | #31                                      | 4.75                                                                    |
|                                                        | #32                                      | 5.75                                                                    |
|                                                        | #33                                      | 10.75                                                                   |
|                                                        | #34                                      | 14                                                                      |

# SUPPLEMENTARY TABLES

**Table S2.** qRT-PCR primers for gene expression analysis of iCMs

| Gene    | Primer sets |                                                                   | Product size (bp) |
|---------|-------------|-------------------------------------------------------------------|-------------------|
| Atp2a2  | F<br>R      | 5'- TCTACGTGGAACCTTTGCCG -3'<br>5'- GCTGCACACACTCTTTACCG -3'      | 162               |
| MyI7    | F<br>R      | 5'- GGTCCCATCAACTTCACCGT -3'<br>5'- AAGGCACTCAGGATGGCTTC -3'      | 86                |
| Actc1   | F<br>R      | 5'- TGCCATGTATGTCGCCATCC -3'<br>5'- CACCATCGCCAGAATCCAGA -3'      | 86                |
| Ryr2    | F<br>R      | 5'- ACGGCGACCATCCACAAAG -3'<br>5'- AAAGTCTGTTGCCAAATCCTTCT -3'    | 67                |
| Myh6    | F<br>R      | 5'- GCCCAGTACCTCCGAAAGTC -3'<br>5'- GCCTTAACATACTCCTCCTTGTC -3'   | 110               |
| GFP     | F<br>R      | 5'- GGACGACGGCAACTACAAGA -3'<br>5'- AAGTCGATGCCCTTCAGCTC -3'      | 87                |
| Ttn     | F<br>R      | 5'- CCGATGTTTACGCAGCCGTTA -3'<br>5'- TCAAAGGTTGCGGTACTACCC -3'    | 62                |
| Slc8a1  | F<br>R      | 5'- CTTCCCTGTTTGTGCTCCTGT -3'<br>5'- AGAAGCCCTTTATGTGGCAGTA -3'   | 78                |
| Casq2   | F<br>R      | 5'- GCCCAACGTCATCCCTAACA -3'<br>5'- CCCATTCAAGTCGTCTTCCCA -3'     | 133               |
| Apobec2 | F<br>R      | 5'- GATCTTCCGCCCTTCGAGATT -3'<br>5'- TCTGTACTTCGACCACATAGCA -3'   | 130               |
| c-Myb   | F<br>R      | 5'- AGACCCCGACACAGCATCTA -3'<br>5'- CAGCAGCCCATCGTAGTCAT -3'      | 81                |
| Tnnc-1  | F<br>R      | 5'- GGAGCTGTCGGATCTCTTCC -3'<br>5'- GGCCATCGTTGTTCTTGTCAC -3'     | 155               |
| Tnni-1  | F<br>R      | 5'- ACCATGCCGGAAGTTGAGAG -3'<br>5'- GAATGCGCTCCGAGAGGTAA -3'      | 151               |
| Tnnt-2  | F<br>R      | 5'- ACAGAGGAGGCCAACGTAGA -3'<br>5'- AAGTTGGGCATGAAGAGCCT -3'      | 113               |
| Hcn4    | F<br>R      | 5'- ACTCCTGGGGGAAGCAGTAT -3'<br>5'- GCCGATGAACATGGCATAGC -3'      | 158               |
| Kcnj5   | F<br>R      | 5'- ATACTCCTTCTGGTGCAGGC -3'<br>5'- GCTCTCTTCTTTGGCTGGCT -3'      | 95                |
| Myh7    | F<br>R      | 5'- ACTGTCAACACTAAGAGGGTCA -3'<br>5'- TTGGATGATTTGATCTTCCAGGG -3' | 114               |
| Nppa    | F<br>R      | 5'- CCCTCGGAGCCTACGAAGAT -3'<br>5'- TGTTGCAGCCTAGTCCACTC -3'      | 80                |
| Nppb    | F<br>R      | 5'- GATCCGTCAAGTCGTTTGGGC -3'<br>5'- AAAGAGACCCAGGCAGAGTCA -3'    | 98                |
| MKi67   | F<br>R      | 5'- ATCATTGACCGCTCCTTTAGGT -3'<br>5'- GCTCGCCTTGATGGTTCCT -3'     | 104               |
| aSMA    | F<br>R      | 5'- ATCACCAACTGGGACGACAT -3'<br>5'- CATACATGGCTGGGACATTG -3'      | 175               |
| Gapdh   | F<br>R      | 5'- AGGTCGGTGTGAACGGATTTG -3'<br>5'- TGTAGACCATGTAGTTGAGGTCA -3'  | 123               |

## **SUPPLEMENTARY MOVIE LEGENDS**

**Movie S1.** A time-lapse recording movie of GFP-fluorescence images (Left) and overlay of GFP and brightfield images (Right) showing that GMT-iCMs underwent cell division from DPI-2 to DPI-4.

**Movie S2.** A time-lapse recording movie of GFP-fluorescence images showing that MGT-iCMs underwent cell division from DPI-2 to DPI-4.
